# Supplementary material
Source: PubMed Central journal article supplement (PMC3158996)
Supplement: NIHMS315350-supplement-01.pdf [file NIHMS315350-supplement-01.pdf]

## Online Supplemental Material

Supplemental Table 1. Multivariable relation of protein intake with BMI, 1730 men, Chicago Western Electric Study \*

| Protein Type*                | $\beta$ (95%CI)     | p-value |
|------------------------------|---------------------|---------|
| Total protein                | 0.35 (0.26, 0.44)   | <0.01   |
| Animal protein               | 0.33 (0.25, 0.42)   | <0.01   |
| Vegetable protein            | -0.25 (-0.55, 0.06) | 0.11    |
| Animal and vegetable protein |                     |         |
| Animal                       | 0.35 (0.25, 0.44)   | <0.01   |
| Vegetable                    | 0.12 (-0.20, 0.45)  | 0.46    |

All models were constructed using generalized estimating equations (GEEs).

\* Protein expressed as a % kcal; model adjusted for age, energy intake, education, cigarette smoking (yes/no), heavy alcohol intake (yes/no), history of chronic disease or diabetes (yes/no), and carbohydrate and saturated fat intake.

## Online Supplemental Material

Supplemental Table 2. Multivariable adjusted odds ratios (95% CIs) of overweight and obesity, model including both animal and vegetable protein, 1730 men, Chicago Western Electric Study

| Protein Type              | Median Intake (%<br>kcal) | Overweight        |                   | Obesity           |                   |
|---------------------------|---------------------------|-------------------|-------------------|-------------------|-------------------|
|                           |                           | Model 1*          | Model 2**         | Model 1*          | Model 2**         |
| Animal                    |                           |                   |                   |                   |                   |
| Q 1                       | 9.3                       | 1.00              | 1.00              | 1.00              | 1.00              |
| Q 2                       | 10.7                      | 1.41 (1.13, 1.78) | 1.42 (1.12, 1.80) | 1.71 (1.05, 2.79) | 1.90 (1.14, 3.17) |
| Q 3                       | 12.0                      | 1.61 (1.27, 2.03) | 1.58 (1.23, 2.03) | 2.43 (1.51, 3.91) | 2.81 (1.68, 4.71) |
| Q 4                       | 13.8                      | 2.52 (1.95, 3.25) | 2.31 (1.73, 3.09) | 4.23 (2.67, 6.70) | 4.48 (2.64, 7.59) |
| <i>P</i> <sub>trend</sub> |                           | <0.01             | <0.01             | <0.01             | <0.01             |
| Vegetable                 |                           |                   |                   |                   |                   |

---

|                           |     |                   |                   |                   |                   |
|---------------------------|-----|-------------------|-------------------|-------------------|-------------------|
| Q 1                       | 2.9 | 1.00              | 1.00              | 1.00              | 1.00              |
| Q 2                       | 3.3 | 1.29 (1.03, 1.63) | 1.16 (0.91, 1.47) | 1.13 (0.75, 1.69) | 0.89 (0.59, 1.34) |
| Q 3                       | 3.6 | 1.55 (1.22, 1.97) | 1.23 (0.96, 1.59) | 1.47 (0.92, 2.22) | 0.98 (0.64, 1.49) |
| Q 4                       | 4.1 | 1.69 (1.32, 2.16) | 1.20 (0.92, 1.58) | 1.47 (0.97, 2.24) | 0.76 (0.47, 1.25) |
| <i>P</i> <sub>trend</sub> |     | <0.01             | 0.08              | <0.01             | 0.51              |

---

All models were constructed using generalized estimating equations (GEEs).

\* Model 1 adjusted for age and energy intake.

\*\* Model 2 adjusted for covariates in model one plus education, cigarette smoking (yes/no), heavy alcohol intake (yes/no), history of chronic disease or diabetes (yes/no), and carbohydrate and saturated fat intake.
